# Supplementary material
Source: PubMed Central journal article supplement (PMC7521642)
Supplement: supp_AC120.014993_161794_2_supp_581904_qf2pp4.pdf [file supp_AC120.014993_161794_2_supp_581904_qf2pp4.pdf]

## Supporting Information

# Heterogeneous Adaptation of Cysteine Reactivity to a Covalent Oncometabolite

Minervo Perez,<sup>1</sup> Daniel W. Bak,<sup>2</sup> Sarah E. Bergholtz,<sup>1</sup> Daniel R. Crooks,<sup>3</sup> Bhargav Srinivas Arimilli,<sup>3</sup> Youfeng Yang,<sup>3</sup> Eranthie Weerapana,<sup>2</sup> W. Marston Linehan,<sup>3</sup> Jordan L. Meier<sup>1\*</sup>

1. Chemical Biology Laboratory, Center for Cancer Research, National Cancer Institute, National Institutes of Health, Frederick, MD, USA.

2. Department of Chemistry, Boston College, Chestnut Hill, MA, USA.

3. Urologic Oncology Branch, Center for Cancer Research, National Cancer Institute, National Institutes of Health, Bethesda, MD, USA.

\*Email: [jordan.meier@nih.gov](mailto:jordan.meier@nih.gov)

### Table of Contents for Supporting Information

|                                                           |       |
|-----------------------------------------------------------|-------|
| Table of Contents                                         | S1    |
| Supplementary Figures S1-S3                               | S2-4  |
| Cell culture and isolation of whole cell lysates          | S5    |
| Chemoproteomic analysis of <i>FH</i> -regulated cysteines | S6-8  |
| Whole proteome protein ReDiMe abundance analysis          | S9-10 |
| Bioinformatic analysis of <i>FH</i> -regulated cysteines  | S11   |
| NMR measurements of cellular fumarate                     | S11   |
| References                                                | S12   |

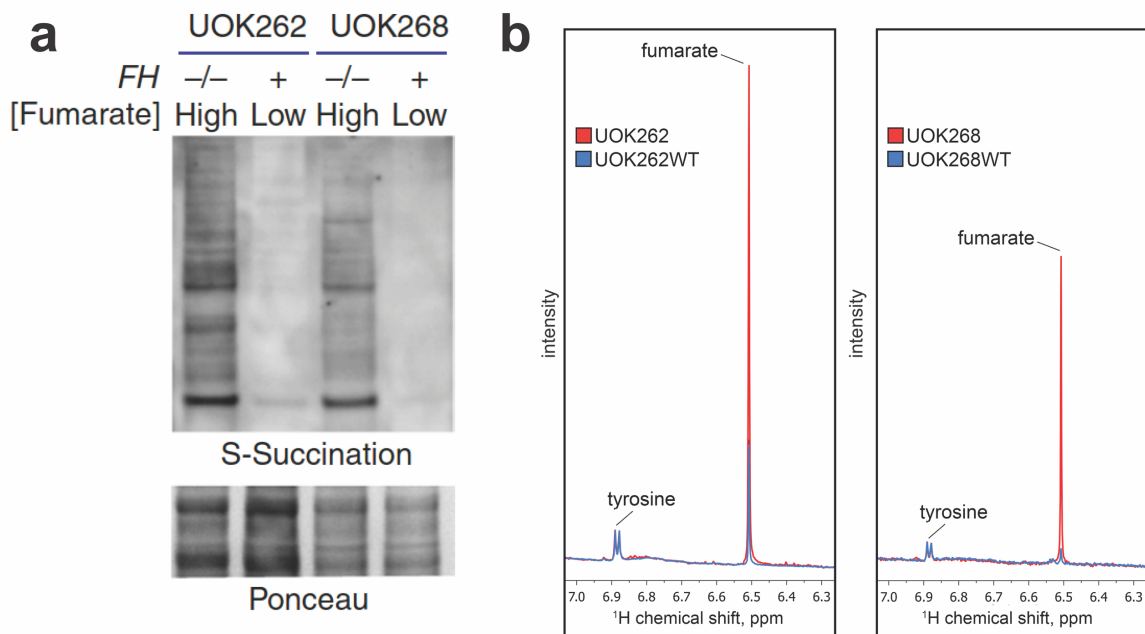

**Figure S1** (a) Anti-S-succination Western blot, indicating different levels of covalent fumarate reaction in UOK262 (metastasis) and UOK268 (kidney) cell lines. Reproduced with permission from Kulkarni et al.<sup>1</sup> (b) NMR metabolic analysis validating higher fumarate levels in UOK262 (*FH*<sup>-/-</sup>, left) and UOK268 (*FH*<sup>-/-</sup>, right) as compared to *FH* rescue cells (“WT”). Fumarate concentrations were: UOK262, 55.8 nmol/mg protein; UOK262WT 16.5 nmol/mg protein; UOK268 28.9 nmol/mg protein; UOK268WT 2.1 nmol/mg protein.

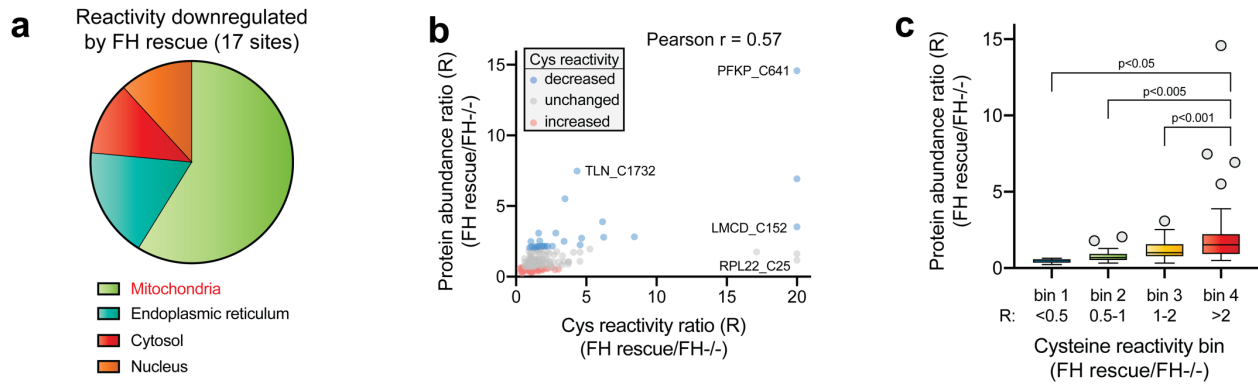

**Figure S2** (a) Cellular localization of cysteine residues downregulated by FH rescue ( $R \geq 2$ ,  $n \geq 2$   $SD \leq 50\%$ ). (b) Correlation of protein abundance and cysteine reactivity ( $n \geq 2$   $SD \leq 25\%$ ). Y-axis represents abundance ratios measured in total proteome ReDiMe measurements. X-axis represents non-transformed cysteine reactivity ratios measured using IA-alkyne enrichment. (c) Cysteines with greater reactivity in FH rescue cells (right bin, red) have significantly increased protein abundance relative to all other cysteine reactivity subsets ( $R \geq 2$ ,  $n \geq 2$   $SD \leq 25\%$ ). Y-axis represents transformed abundance ratios measured in total proteome ReDiMe measurements.

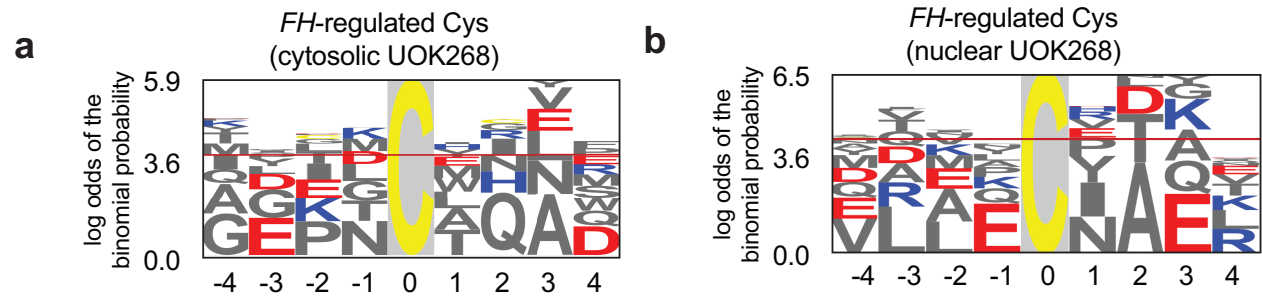

**Figure S3** Motif analysis of *FH*-regulated cysteines derived from (a) cytosolic, and (b) nuclear proteins.

## **Cell culture and isolation of whole cell lysates**

UOK268 (FH  $-/-$ ) cells were cultured at 37 °C under 5% CO<sub>2</sub> atmosphere grown in Dulbecco's modified eagle medium (DMEM) supplemented with 10 % fetal bovine serum, 2 mM L-glutamine and 1 mM sodium pyruvate, while the UOK268 FH (+/+) rescue media was supplemented with 0.3 µg/mL Blasticidin. Cells were grown to 80% confluency then DMEM media was removed and cells were washed with PBS. Proteomes were harvested by rinsing cells 2X with ice cold PBS and scrapped into a 50 mL conical. Subsequently, cells were washed 3X with 30 mL of ice-cold PBS and centrifuged (500 r.c.f x 5 min, 4°C). Following the final PBS wash, cell pellets were resuspended with 1 mL of ice-cold PBS, transferred to a 1.7 mL microtube and centrifuged to remove excess PBS. Cell pellets were resuspended with 1 mL of lysis buffer consisting of PBS with 1X protease inhibitor cocktail (Cell Signaling # 5871). The resuspended cells were lysed by sonication (3 x 1 second pulse, amplitude 1, 60 seconds resting on ice between pulses) using a 100W QSonica XL2000 sonicator. Following sonication, the lysates were centrifuged (14,000 r.c.f x 30 minutes, 4 °C) and protein concentration was determined via Qubit Protein Assay Kit on a Qubit 2.0 Fluorometer. Lysates were diluted with lysis buffer to a 2 mg/mL protein concentration and store at -80 °C.

## Chemoproteomic analysis of *FH*-regulated cysteines

### Chemoproteomic labeling and enrichment of *FH*-regulated cysteines

For identification and enrichment of *FH*-regulated cysteines (Table S1), 2 mg of UOK268 (*FH*<sup>-/-</sup>) or UOK268WT (*FH*<sup>+/+</sup>) proteomes (1 mL, 2 mg/mL) were labeled with 100  $\mu$ M IA-alkyne (10  $\mu$ L, 10 mM stock in DMSO) for 1 h at room temperature. Probe labeled proteins were then conjugated to UV-cleavable biotin-azide (UV-azo) tag by Cu(I)-catalyzed [3 + 2] cycloaddition as previously reported.<sup>1</sup> Briefly, azo-tag (100  $\mu$ M), TCEP (1 mM), TBTA (100  $\mu$ M), and CuSO<sub>4</sub> (1 mM) were sequentially added to the labeled proteome. Reactions were vortexed and incubated at room temperature for 1 h. Proteomes were centrifuged (6500 rcf x 10 min, 4 °C) to collect precipitated protein. Supernatant was discarded, and protein pellets were resuspended in 500  $\mu$ L of methanol (dry-ice chilled) with sonication, and centrifuged (6500 rcf x 10 min, 4 °C). This step was repeated, and the resulting washed pellets was redissolved (1.2% w/v SDS in PBS; 1 mL); sonication followed by heating at 80-95 °C for 5 min was used to ensure complete solubilization. Samples were cooled to room temperature, diluted with PBS (5.0 mL), and incubated with Streptavidin beads (100  $\mu$ L of 50% aqueous slurry per enrichment) overnight at 4 °C. Samples were allowed to warm to room temperature, pelleted by centrifugation (1400 rcf x 3 min), and supernatant discarded. Beads were then sequentially washed with 0.2% SDS in PBS (5 mL x 1), PBS (5 mL x 3) and H<sub>2</sub>O (5 mL x 3) for a total of 7 washes.

### On-bead reductive alkylation, and tryptic digest of proteomic samples

Following the final wash, protein-bound streptavidin beads were resuspended in 6 M urea in PBS (500  $\mu$ L) and reductively alkylated by sequential addition of 10 mM DTT (25  $\mu$ L of 200 mM in H<sub>2</sub>O, 65 °C for 20 min) and 20 mM iodoacetamide (25  $\mu$ L of 400 mM in H<sub>2</sub>O, 37 °C for 30 min) to each sample. Reactions were then diluted by addition of PBS (950  $\mu$ L), pelleted by centrifugation (1400 rcf x 3 min), and the supernatant discarded. Samples were then subjected to tryptic digest by addition of 200  $\mu$ L of a pre-mixed solution of 2M urea in PBS, 1 mM CaCl<sub>2</sub> (2  $\mu$ L of 100 mM in H<sub>2</sub>O), and 2  $\mu$ g of Trypsin Gold (Promega, 4  $\mu$ L of 0.5  $\mu$ g/ $\mu$ L in 1% acetic acid). Samples were shaken overnight at 37 °C and pelleted by centrifugation (1400 rcf x 3 min). Beads were then washed sequentially with PBS (500  $\mu$ L x 2), H<sub>2</sub>O (500  $\mu$ L x 2), and 100 mM triethylammonium bicarbonate (TEAB) buffer (500  $\mu$ L x 2) and subsequently resuspended in 100 mM TEAB (100  $\mu$ L).

### On-bead reductive dimethylation (ReDiMe) and UV-cleavage of proteomic samples

Isotopic labeling of samples was achieved through on-bead reductive dimethylation (ReDiMe),<sup>2</sup> performed by the addition of 4  $\mu\text{L}$  of light (UOK268, FH+/+) or heavy (UOK268, FH/-) 20% formaldehyde (HCHO or  $\text{D}^{13}\text{CDO}$ , respectively) and 20  $\mu\text{L}$  of 0.6 M sodium cyanoborohydride (25  $^{\circ}\text{C}$ , 2 hours). Beads were then washed with 100 mM TEAB (500  $\mu\text{L}$  x 2), mixed, and washed with  $\text{H}_2\text{O}$  (500  $\mu\text{L}$  x 2). The combined beads were resuspended in  $\text{H}_2\text{O}$  (200  $\mu\text{L}$ ) and irradiated with 365 nm UV light for 1 h to release labeled peptides. Beads were pelleted by centrifugation (1,400 g, 3 min, 25  $^{\circ}\text{C}$ ) and the supernatant transferred to a new centrifuge tube. The beads were washed with PBS (100  $\mu\text{L}$ , 2x), with the washes being combined with the previous supernatants, for a total eluted peptide sample volume of  $\sim 350$   $\mu\text{L}$ . Formic acid (17.5  $\mu\text{L}$ ) was added to a final concentration of 5% and samples were stored at -20  $^{\circ}\text{C}$  until ready for LC/LC-MS/MS analysis.

### LC/LC-MS/MS and data analysis for quantitative cysteine reactivity profiling

Mass spectrometry was performed using a Thermo LTQ Orbitrap Discovery mass spectrometer coupled to an Agilent 1200 series HPLC. Labeled peptide samples were pressure loaded onto 250 mm fused silica desalting column packed with 4 cm of Aqua C18 reverse phase resin (Phenomenex). Peptides were eluted onto a 100-mm fused silica biphasic column packed with 10 cm C18 resin and 4 cm Partisphere strong cation exchange resin (SCX, Whatman), using a five-step multidimensional LC-MS protocol (MudPIT). Each of the five steps used a salt push (0%, 50%, 80%, 100%, and 100%), followed by a gradient of buffer B in Buffer A (Buffer A: 95% water, 5% acetonitrile, 0.1% formic acid; Buffer B: 20% water, 80% acetonitrile, 0.1% formic acid) as outlined previously.<sup>3</sup> The flow rate through the column was  $\sim 0.25$   $\mu\text{L}/\text{min}$ , with a spray voltage of 2.75 kV. One full MS1 scan (400-1800 MW) was followed by 8 data dependent scans of the  $n^{\text{th}}$  most intense ion. Dynamic exclusion was enabled. The tandem MS data, generated from the 5 MudPIT runs, was analyzed by the SEQUEST algorithm.<sup>4</sup> Both static (+57.0215 m/z, iodoacetamide alkylation) and differential (+180.1375 m/z, iodacetamide alkyne labeling) modifications on cysteine residues were specified. The precursor-ion mass tolerance was set at 50 ppm while the fragment-ion mass tolerance was set to 0 (default setting). Data was searched against a human reverse-concatenated non-redundant FASTA database containing Uniprot identifiers. MS datasets were independently searched with light and heavy ReDiMe parameter files; for these searches, static modifications on lysine and the n-terminus of +28.0313 (light) or +34.0632 (heavy) were used. MS2 spectra matches were assembled into protein identifications

and filtered using DTASelect2.0,<sup>5</sup> to generate a list of protein hits with a peptide false-discovery rate of <5%. With the `-trypstat` and `-modstat` options applied, peptides were restricted to fully tryptic (`-y 2`) with a found modification (`-m 0`) and a delta-CN score greater than 0.06 (`-d 0.06`). Single peptides per locus were also allowed (`-p 1`) as were redundant peptides identifications from multiple proteins, but the database contained only a single consensus splice variant for each protein. Quantification of peptide L/H ratios were calculated using the cimage quantification package described previously.<sup>3</sup>



## Whole proteome protein ReDiMe abundance analysis

### Whole-proteome ReDiMe sample preparation

For quantification of protein abundance changes upon FH-rescue (Table S3), 100 µg of both UOK268, FH<sup>-/-</sup> and UOK268, FH<sup>+/+</sup> proteomes (100 µL, 1 mg/mL) were precipitated by the addition of 5 µL 100% trichloroacetic acid in PBS, vortexed and frozen (-80 °C, overnight). After thawing, proteins were pelleted by centrifugation (15,000 g, 10 min, 4 °C) and solvent removed. Protein pellets were resuspended in 500 µL of ice-cold acetone by bath sonication and pelleted by centrifugation (5000g, 10 min, 4 °C). The solvent was removed and the pellet was allowed to air dry and then resuspended in 8 M Urea in 100 mM TEAB (30 µL). Reductive alkylation was performed by the sequential addition of 100 mM TEAB (70 µL), 1.5 µL of 1 M DTT (65 °C, 15 min), and 2.5 µL of 400 mM iodoacetamide (25 °C, 30 min). Reactions were diluted with additional 100 mM TEAB (120 µL) and tryptic digestion performed by the addition of 2 µg of sequencing-grade trypsin (4 µL of 20 µg diluted in H<sub>2</sub>O) and 2.5 µL of 100 mM CaCl<sub>2</sub> (37 °C, overnight). After tryptic digest, reductive dimethylation<sup>6</sup> was performed by the addition of 4 µL of 20% light (UOK268, FH<sup>+/+</sup>) or heavy (UOK268, FH<sup>-/-</sup>) formaldehyde and 20 µL of 0.6 M sodium cyanoborohydride (25 °C, 2 hours). The reaction was quenched by the addition of 8µL ammonium hydroxide (25 °C, 15 min). The light (UOK268, FH<sup>+/+</sup>) and heavy (UOK268, FH<sup>-/-</sup>) tryptic peptide samples were then combined, desalted on a Sep-Pak, and dried by speed-vac. Peptide samples were stored at -20 °C until ready for fractionation and LC-MS/MS analysis.

### Off-line high pH ReDiMe peptide fractionation

Samples were resuspended in 500 µL of high pH buffer A (95% H<sub>2</sub>O, 5% acetonitrile, 10 mM ammonium bicarbonate) and loaded onto a manual injection loop connected to an Agilent 1100 Series HPLC. Peptides were separated on a 25 cm Agilent Extend-C18 column using a 60 min gradient from 20-35% high pH buffer B (10% H<sub>2</sub>O, 90% acetonitrile, 10 mM ammonium bicarbonate).<sup>7</sup> Fractions were collected using a Gilson FC203B fraction collector into a 96 deep-well plate (0.6 min/well). Subsequent concatenation of every sixth well resulted in six pooled fractions for later LC-MS/MS analysis. These six fractions were dried by speed-vac and then resuspended in 30 µL of low pH buffer A (95% H<sub>2</sub>O, 5% acetonitrile, 0.1% formic acid).

### LC-MS/MS and data analysis for ReDiMe whole-proteome quantification

LC-MS/MS was performed on a Thermo LTQ Orbitrap XL mass spectrometer (Thermo Scientific) coupled to an easy-nanoLC system (Agilent). For each of the six off-line fractions, 10  $\mu$ L of peptide mixture was pre-loaded onto a C18 pre-column. Peptides were eluted onto a 100-mm fused silica column packed with 10 cm C18 resin using a 4 hour gradient of buffer B in Buffer A (Buffer A: 95% water, 5% acetonitrile, 0.1% formic acid; Buffer B: 20% water, 80% acetonitrile, 0.1% formic acid). The flow rate through the column was  $\sim$ 0.4  $\mu$ L/min, with a spray voltage of 2.75 kV. One full MS1 scan (400-1800 MW) was followed by 8 data dependent scans of the  $n^{\text{th}}$  most intense ion. Dynamic exclusion was enabled. Tandem mass spectra were extracted from the Xcalibur data system format (.raw) into MS2 format using Raw-Xtract 1.9.9.2. The tandem MS data was analyzed by the SEQUEST algorithm.<sup>4</sup> Static modification of cysteine residues (+57.0215 m/z, iodoacetamide alkylation) was assumed with no enzyme specificity and one missed cleavage allowed. The precursor-ion mass tolerance was set at 50 ppm while the fragment-ion mass tolerance was set to 0 (default setting). Data was searched against a human reverse-concatenated non-redundant FASTA database containing Uniprot identifiers (downloaded on November 2012; number of protein entries = 20,210). MS datasets were independently searched with light and heavy ReDiMe parameter files; for these searches, static modifications on lysine and the n-terminus of +28.0313 (light) or +34.0632 (heavy) were used. MS2 spectra matches were assembled into protein identifications and filtered using DTASelect2.0,<sup>5</sup> to generate a list of protein hits with a peptide false-discovery rate of <5%. Quantification of protein L/H ratios were calculated using the cimage quantification package described previously.<sup>3</sup> The mass spectrometry proteomics data have been deposited to the ProteomeXchange Consortium via the PRIDE partner repository with the data set identifier PXD020073.

## Bioinformatic analysis of FH-regulated cysteines

Annotation of protein subcellular localization as well as cysteine function and conservation was generated from the Uniprot Protein Knowledgebase (UniProtKB) as described previously.<sup>8</sup> Analysis of linear sequences flanking *FH*-regulated cysteines was performed using the informatics tool pLogo, accessible at: <https://plogo.uconn.edu>. Input sequences are listed in Table S10, and were derived from the 25 cysteines found to be most *FH*-regulated in each compartment (highest R values,  $n \geq 2$ ,  $SD \leq 50\%$ ) using high-confidence values derived from ReDiMe abundance correction (Table S4). Protein sequences for motif analysis were derived from their tryptic peptide sequences using Peptide Extender ([schwartzlab.uconn.edu/pepextend](http://schwartzlab.uconn.edu/pepextend)). Conservation and functional impact of *FH*-regulated cysteines identified in chemoproteomic experiments was analyzed using the informatics tool Mutation Assessor, accessible at: <http://mutationassessor.org/r3>. Potential functional impact of fumarate modifications reflects the effect of C to G mutations on the functional impact (FI) output of Mutation Assessor. Gene ontology analysis was performed using the bioinformatics tool DAVID, accessible at: <http://david.ncifcrf.gov/>.

## NMR measurement of cellular fumarate

For assessment of cellular fumarate levels, UOK262, UOK262WT, UOK268 and UOK268WT polar cellular metabolites were extracted using a previously published procedure,<sup>10</sup> and total dry cellular protein mass for each sample was measured using a 5-place analytical balance following extraction. Lyophilized polar metabolites were reconstituted in 200 $\mu$ L of deuterium oxide ( $D_2O$ ) containing 15nmol of deuterated sodium trimethylsilylpropanesulfonate (DSS-d6) as the chemical shift reference standard, and transferred to disposable 3mm glass NMR tubes. Spectra were recorded at 293K in a 16.45 T Bruker spectrometer equipped with a 3 mm triple inverse resonance cryoprobe. 512 transients were acquired for each sample with a relaxation delay of 6 seconds and a water presaturation sequence. The resulting spectra were phased following apodization using an exponential function with 1 Hz line broadening using the MestreNova software package. Spectral intensities of the fumarate peak at 6.51ppm were converted to molar quantities in reference to the DSS peak area and normalized to dry cellular protein mass. Calculated fumarate concentrations are presented as nmol fumarate per mg dry protein mass.

## References

1. Kulkarni, R. A., Bak, D. W., Wei, D., Bergholtz, S. E., Briney, C. A., Shrimp, J. H., Alpsoy, A., Thorpe, A. L., Bavari, A. E., Crooks, D. R., Levy, M., Florens, L., Washburn, M. P., Frizzell, N., Dykhuizen, E. C., Weerapana, E., Linehan, W. M., Meier, J. L., 2019. A chemoproteomic portrait of the oncometabolite fumarate. *Nat Chem Biol*, 15, 391-400.
2. Qian, Y., Martell, J., Pace, N.J., Ballard, T.E., Johnson, D.S. and Weerapana, E., 2013. An isotopically tagged azobenzene-based cleavable linker for quantitative proteomics. *ChemBiochem*, 14, 1410-1414.
3. Yang, F., Gao, J., Che, J., Jia, G. and Wang, C., 2018. A dimethyl-labeling-based strategy for site-specifically quantitative chemical proteomics. *Analytical Chemistry*, 90 (15), 9576-9582.
4. Weerapana, E. *et al.* 2010. Quantitative reactivity profiling predicts functional cysteines in proteomes. *Nature*, 468, 790-795.
5. Eng, J. K., McCormack, A. L. & Yates, J. R. 1994. An approach to correlate tandem mass spectral data of peptides with amino acid sequences in a protein database. *J Am Soc Mass Spec*, 5, 976-989.
6. Tabb, D. L., McDonald, W. H. & Yates, J. R. 2002. DTASelect and Contrast: tools for assembling and comparing protein identifications from shotgun proteomics. *J Proteome Res*, 1, 21-26.
7. Boersema, P.J., Raijmakers, R., Lemeer, S., Mohammed, S. and Heck, A.J., 2009. Multiplex peptide stable isotope dimethyl labeling for quantitative proteomics. *Nature protocols*, 4, 484.
8. Edwards, A. and Haas, W., 2016. Multiplexed quantitative proteomics for high-throughput comprehensive proteome comparisons of human cell lines. In *Proteomics in Systems Biology* (pp. 1-13). Humana Press, New York, NY.
9. Bak, D. W., Pizzagalli M. D., and Weerapana E. 2017. Identifying Functional Cysteine Residues in the Mitochondria. *ACS Chem Biol*, 12, 947–957.
10. Crooks, D. R., Fan, T. W., and Linehan, W. M. 2019. Metabolic Labeling of Cultured Mammalian Cells for Stable Isotope-Resolved Metabolomics: Practical Aspects of Tissue Culture and Sample Extraction. *Methods Mol Biol* 1928, 1-27
